# Supplementary material
Source: publisher figshare collection journal article supplement (https://acs.figshare.com/ndownloader/files/6906860)
Supplement: Supplementary file 1 [file 6906860]

## Supporting Information

### **Cu Nanoclusters: Novel Electrochemiluminescence Emitters for Bioanalysis**

Min Zhao, An-Yi Chen, Dan Huang, Ying Zhuo,<sup>\*</sup> Ya-Qin Chai, Ruo Yuan<sup>\*</sup>

*Key Laboratory of Luminescent and Real-Time Analytical Chemistry (Southwest University), Ministry of Education, College of Chemistry and Chemical Engineering, Southwest University, Chongqing 400715, China*

---

<sup>\*</sup>Corresponding authors at: Tel.: +86 23 68252277, fax: +86 23 68253172.

E-mail addresses: [yingzhuo@swu.edu.cn](mailto:yingzhuo@swu.edu.cn) (Y. Zhuo), [yuanruo@swu.edu.cn](mailto:yuanruo@swu.edu.cn) (R. Yuan).

## Table of Contents

|                                                                |      |
|----------------------------------------------------------------|------|
| Characterization of the Biosensor Construction.....            | S-3  |
| The Assembly of HZ onto the Surface of GCE.....                | S-4  |
| Optimization of the BSA Concentration in Cu NCs Synthesis..... | S-5  |
| Table S1.....                                                  | S-7  |
| Table S2.....                                                  | S-8  |
| Table S3.....                                                  | S-9  |
| References.....                                                | S-10 |

## Characterization of the Biosensor Construction

The interfacial changes of the working electrode were characterized by scanning electron microscopy (SEM) and CVs. Compared with the clean and smooth surface of bare GCE (Figure S1A), a compact and irregular film was observed on the surface of GCE after assembling HZ (Figure S1B). In order to further confirm the generation of HZ on the surface of GCE, the CVs characterization was implemented in 3 mL PBS buffer containing 5.0 mM  $[\text{Fe}(\text{CN})_6]^{3-/4-}$  at the potential range of -0.2 to 0.6 V (100 mV/s). It could be seen that a pair of well-defined redox peaks was observed at bare GCE (Figure S1C, curve a). While the peak currents were evidently decreased after assembling HZ (Figure S1C, curve b). This could be attributed to the obstruction of the HZ films.

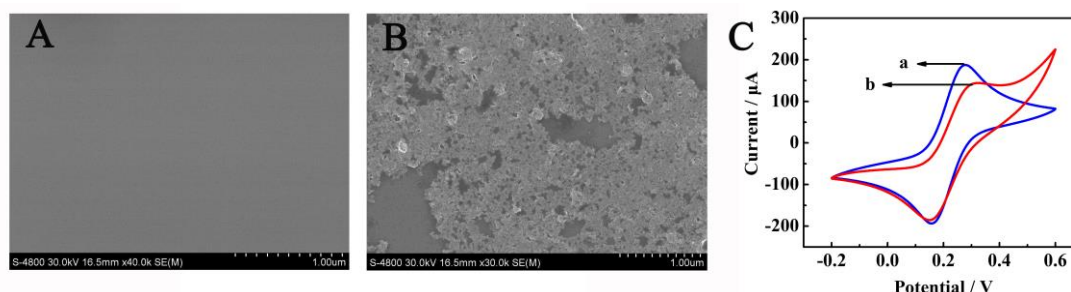

**Figure S1** SEM images of the GCE without (A) and with assembling HZ (B). (C) CVs characterization for the stepwise biosensor fabrication measured in 0.1 M PBS (pH 8.0) containing 5.0 mM  $[\text{Fe}(\text{CN})_6]^{3-/4-}$ : (a) bare GCE, (b) HZ/GCE.

## The Assembly of HZ onto the Surface of GCE

It was reported that the glassy carbon electrode (GCE) was made up of 100%  $sp^2$  carbon material<sup>1,2</sup>. When the clean GCE was immersed in PBS containing 50 mM HZ and then was electrochemically activated with the cyclic voltammograms scanning for 40 cycles in the range of -1.5 V to 1.5 V (100 mV/s). In this scanning process, the surface of GCE was electrochemically activated to make the GCE modify with massive quinonyl groups and a few carbonyl, phenolic groups<sup>3-5</sup>. And then the quinonyl groups of the GCE surface were reacted with amino group of HZ to generate  $-C=N-NH_2$ <sup>6,7</sup>. The reaction mechanism of GCE surface was summarized as following equations:

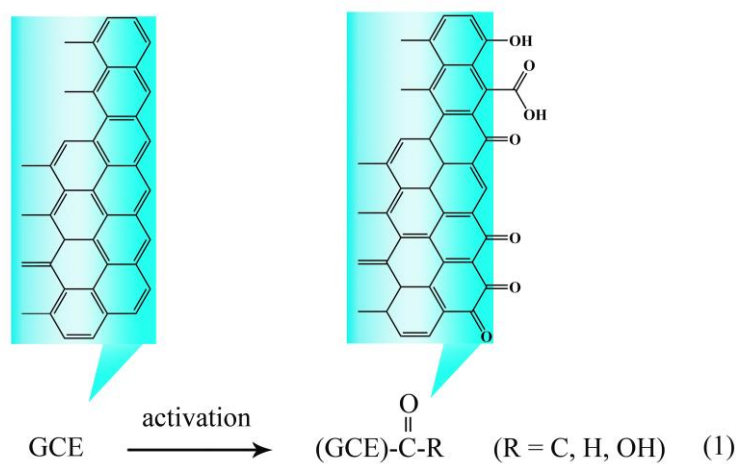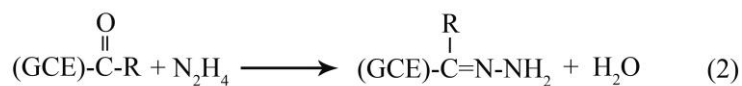

## Optimization of the BSA Concentration in Cu NCs Synthesis

BSA as the protecting ligands is the main factor for the successful synthesis of stable Cu NCs. In order to synthesize stable Cu NCs, the amount of BSA should be sufficient as protecting ligands. However, if the BSA is excessive, the non-conductive BSA macromolecules with molecular weight of ~66.4 kDa would hinder electron transfer to reduce the ECL signal of Cu NCs since the excessive BSA could not be removed from the BSA-protected Cu NCs *via* the dialysis. Thus, the amount of BSA protecting ligands which has a remarkable effect on the ECL signal of Cu NCs has been optimized during the preparation of the stable Cu NCs. In the synthesis of Cu NCs, 1 mL of 10 mM CuSO<sub>4</sub> aqueous solution is put into 1 mL of different concentrations of BSA aqueous solution, and the following experimental procedures are the same as the part of *Synthesis of Cu NCs*. Then, the HZ/GCE was measured under the potential range of 0 to 1.45 V in 2 mL PBS (pH 8.0) containing above-mentioned parallel Cu NCs, respectively. As exhibited in Figure S2, the ECL responses increase with the increasing concentration of BSA in the range from 0.05 to 2.0 mg/mL, and then decreased, which corresponded to the saturated state. Consequently, the optimal concentration of 2.0 mg/mL BSA was selected for the Cu NCs synthesis.

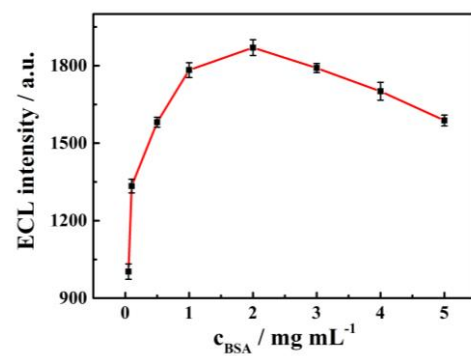

**Figure S2** Influence of BSA concentration on the ECL response of the Cu NCs.

**Table S1** Comparison of new Cu NCs/HZ-based ECL system with other ECL systems for DA detection.

| ECL system                                                                | Linear range                           | LOD               | Ref       |
|---------------------------------------------------------------------------|----------------------------------------|-------------------|-----------|
| SCP dots/TPA                                                              | 0.05 $\mu\text{M}$ ~ 10 $\mu\text{M}$  | 50 nM             | 8         |
| Au <sub>25</sub> /S <sub>2</sub> O <sub>8</sub> <sup>2-</sup> system      | 2.5 $\mu\text{M}$ ~ 47.5 $\mu\text{M}$ | Not shown         | 9         |
| Ag <sub>2</sub> Se QDs/S <sub>2</sub> O <sub>8</sub> <sup>2-</sup> system | 0.5 $\mu\text{M}$ ~ 19 $\mu\text{M}$   | 0.1 $\mu\text{M}$ | 10        |
| CdS QDs/H <sub>2</sub> O <sub>2</sub> system                              | 1 $\mu\text{M}$ ~ 10 mM                | Not shown         | 11        |
| CdTe QDs/O <sub>2</sub> system                                            | 50 pM ~ 10 nM                          | 26 pM             | 12        |
| Peptide nanovesicle/S <sub>2</sub> O <sub>8</sub> <sup>2-</sup> system    | 10 pM ~ 200 pM                         | 3.15 pM           | 13        |
| Cu NCs/HZ                                                                 | 1 pM ~ 10 nM                           | 0.35 pM           | This work |

**Table S2** Comparison of this developed biosensor with other biosensors for DA detection.

| Method                         | Linear range                         | LOD              | Ref       |
|--------------------------------|--------------------------------------|------------------|-----------|
| Fluorescence                   | 0.1 $\mu\text{M}$ ~ 10 $\mu\text{M}$ | 68 nM            | 14        |
| Linear-sweep voltammograms     | 0.1 $\mu\text{M}$ ~ 30 $\mu\text{M}$ | Not shown        | 15        |
| Chronoamperometric method      | 0.5 nM ~ 100 $\mu\text{M}$           | 50 nM            | 16        |
| Colorimetry                    | 0 ~ 0.6 $\mu\text{M}$                | 60 $\mu\text{M}$ | 17        |
| Differential pulse voltammetry | 0.5 $\mu\text{M}$ ~ 50 $\mu\text{M}$ | 20 nM            | 18        |
| ECL                            | 1 pM ~ 10 nM                         | 0.35 pM          | This work |



**Table S3** Recovery of DA in human serum samples by the proposed sensor.

| Sample number | Added (M)             | Found (M) <sup>a</sup>        | Recovery (%) |
|---------------|-----------------------|-------------------------------|--------------|
| 1             | 0                     | 0.009 ± 0.01                  | --           |
| 2             | 5.0×10 <sup>-12</sup> | 4.88×10 <sup>-12</sup> ± 0.05 | 97.6         |
| 3             | 5.0×10 <sup>-11</sup> | 5.03×10 <sup>-11</sup> ± 0.14 | 100.6        |
| 4             | 1.0×10 <sup>-10</sup> | 0.96×10 <sup>-10</sup> ± 0.09 | 96.0         |
| 5             | 5.0×10 <sup>-9</sup>  | 5.11×10 <sup>-9</sup> ± 0.11  | 102.2        |

<sup>a</sup> Mean value ± SD of three measurements.

## References

- (1) Chen, P. H.; McCreery, R. L. *Anal. Chem.* **1996**, *68*, 3958-3965.
- (2) Kneten, K. R.; McCreery, R. L. *Anal. Chem.* **2002**, *64*, 2518-2524.
- (3) Engstrom, R. C.; Strasser, V. A. *Anal. Chem.* **1984**, *56*, 136-141.
- (4) Nagaoka, T.; Yoshino, T. *Anal. Chem.* **1986**, *58*, 1037-1042.
- (5) Huang, B. Z.; Jia, N. M.; Chen, L. N.; Tan, L.; Yao, S. Z. *Anal. Chem.* **2014**, *86*, 6940-6947.
- (6) Byrkit, G. D.; Michalek, G. A. *Ind. Eng. Chem. Res.* **1950**, *42*, 1862-1875.
- (7) Evans, R. F., *Rev. Pure Appl. Chem.* **1962**, *12*, 146-164.
- (8) Feng, Y. Q.; Dai, C. H.; Lei, J. P.; Ju, H. X.; Cheng, Y. X. *Anal. Chem.* **2016**, *88*, 845-850.
- (9) Li, L. L.; Liu, H. Y.; Shen, Y. Y.; Zhang, J. R.; Zhu, J. J. *Anal. Chem.* **2011**, *83*, 661-665.
- (10) Cui, R.; Gu, Y. P.; Bao, L.; Zhao, J. Y.; Qi, B. P.; Zhang, Z. L.; Xie, Z. X.; Pang, D. W. *Anal. Chem.* **2012**, *84*, 8932-8935.
- (11) Shi, C. G.; Shan, X.; Pan, Z. Q.; Xu, Lu, ; Bao, Gu, H. Y. *Anal. Chem.* **2012**, *84*, 3033-3038.
- (12) Zhang, L.; Cheng, Y.; Lei, J. P.; Liu, Y. T.; Hao, Q.; Ju, H. X. *Anal. Chem.* **2013**, *85*, 8001-8007.
- (13) Huang, C. X.; Chen, X.; Lu, Y. L.; Yang, H.; Yang, W. S. *Biosens. Bioelectron.*, **2015**, *63*, 478-482.
- (14) Qu, K. G.; Wang, J. S.; Ren, J. S.; Qu, X.G. *Chem. Eur. J.* **2013**, *19*, 7243-7249.

- (15) Liu, A. H.; Wei, M. D.; Honma, I.; Zhou, H. S. *Adv. Funct. Mater.* **2006**, *16*, 371-376.
- (16) Suzuki, A.; Ivandini, T. A.; Yoshimi, K.; Fujishima, A.; Oyama, G.; Nakazato, T.; Hattori, N.; Kitazawa, S.; Einaga, Y. *Anal. Chem.* **2007**, *79*, 8608-8615.
- (17) Lin, Y. H.; Chen, C. E.; Wang, C. Y.; Pu, F.; Ren, J. S.; Qu, X. G. *Chem. Commun.* **2011**, *47*, 1181-1183.
- (18) Liu, M. L.; Chen, Q.; Lai, C. L.; Zhang, Y. Y.; Deng, J. H.; Li, H. T.; Yao, S. Z. *Biosens. Bioelectron.*, **2013**, *48*, 75-81.
